# Supplementary material for: Synthesis of tetrahalide dianions directed by crystal engineering
Source: Royal Society of Chemistry journal article supplement (doi:10.1039/c5ce01288k), 2015-01-01
Supplement: c5ce01288k1.pdf [file c5ce01288k1.pdf]

## **Supporting Information**

# **Synthesis of Tetrahalide Dianions Directed by Crystal Engineering**

F. Pan<sup>a,b</sup>, R. Puttreddy<sup>b</sup>, K. Rissanen<sup>\*b</sup> and U. Englert<sup>\*a</sup>

**P2, Synthesis and crystallization**

**P3, Experimental details of X-ray single crystal, powder diffraction, and Raman spectroscopy.**

**P4-P5, X-ray crystallographic table**

**P6, X-ray powder diffraction patterns**

**P7, Plots of the macrocyclic structures of 1a, 2a, 2b, 2c, and 3a.**

**P8, Figures to show the hydrogen bonds in 3b, and halogen bonds in 3c.**

**P9, Raman spectroscopy in 1a, 2a and 3a**

## Synthesis and crystallization

Sodium sulfadiazine is commercially available. It was used without purification. For the synthesis of **1a**, 1.0 mL of concentrated hydrochloric acid (38 %) was added to a solution of 0.1 mmol of sodium sulfadiazine (0.0272 g) in 15 mL of methanol in the presence of 0.1 mmol I<sub>2</sub> (0.0253 g). The resulting solution was left undisturbed at room temperature; after two days light brown needle-shaped crystals of **1a** were obtained. Elemental analysis, Calc. for C<sub>10</sub>H<sub>11</sub>O<sub>2</sub>N<sub>4</sub>SCl (1a): C% 29.04; H% 2.68; N% 13.54. Found C% 28.93; H% 2.42; N% 13.34.

The synthesis and crystallization of **2a**, **2b** and **2c** are analogous to that of **1a**, **1b** and **1c** respectively: 1.0 mL of concentrated hydrobromic acid (47 %) was added to a solution of 0.1 mmol of sodium sulfadiazine (0.0272 g) in 15 mL of methanol in the presence of 0.1 mmol I<sub>2</sub> (0.0253 g). The resulting solution was left undisturbed at room temperature; after two days light brown needle-shaped crystals of **2a** were obtained. For the synthesis of **2b**, ethylene glycol (0.5 ml) instead of I<sub>2</sub> was added to the solution, large light yellow block crystals of **2b** were generated after two days. For the synthesis and crystallization of **2c**, 15 ml of ethanol was used as the solvent without I<sub>2</sub> and glycol. The process needed three days by slow evaporation to get the large light yellow block-shaped crystals **2c**. Elemental analysis, Calc. for C<sub>10</sub>H<sub>11</sub>O<sub>2</sub>N<sub>4</sub>SBri (2a): C% 26.22; H% 2.42; N% 12.23. Found C% 26.47; H% 2.44; N% 12.33.

Synthesis and crystallization of **3a**, 1.0 mL of concentrated hydriodic acid (64%) was added to a solution of 0.1 mmol of sodium sulfadiazine (0.0272 g) in 15 mL of methanol in the presence of 0.1 mmol I<sub>2</sub> (0.0253 g). The resulting solution was left undisturbed at room temperature; after two days light brown needle-shaped crystals of **3a** were obtained. For the synthesis of **3b**, ethylene glycol (0.5 ml) instead of I<sub>2</sub> was added to the solution, light yellow plate crystals of **3b** were generated after two days. For the synthesis and crystallization of **3c**, 15 ml of ethanol was used as the solvent without additional I<sub>2</sub> or glycol. The process needed three days by slow evaporation to get the brown plate-shaped crystals **3c**. Elemental analysis, Calc. for C<sub>10</sub>H<sub>11</sub>O<sub>2</sub>N<sub>4</sub>SI<sub>2</sub> (3a): C% 23.78; H% 2.20; N% 11.09. Found C% 23.57; H% 2.04; N% 10.98.

## **X-Ray Diffraction**

### **Single Crystal Diffraction**

All the single crystal data were collected on a Bruker D8 goniometer equipped with an APEX CCD detector using Mo- $K\alpha$  radiation ( $\lambda = 0.71073 \text{ \AA}$ ); the radiation source was an INCOATEC  $I\text{-}\mu\text{S}$  microsource equipped with multilayer optics. An Oxford Cryosystems 700 controller was used to ensure temperature stability during data collection. For the high resolution data collection, two settings of the detector angle  $\theta$  for low and high-order reflections with sufficient overlap were used, with several runs of different crystal rotation  $\phi$  for each detector setting and exposure times of 5 s per frame for low-order and 20 s for high-order data. High resolution intensity data extend to  $\sin \theta_{\text{max}}/\lambda > 1.105 \text{ \AA}^{-1}$ , corresponding to  $\theta_{\text{max}} > 51^\circ$  for Mo  $K\alpha$  radiation. All frames were collected in  $\omega$ -scan mode, and the intensities were integrated with the help of the program SAINT (Bruker, 2003). Multi-scan absorption corrections improved both merging ( $R_{\text{int}}$ ) and refinement residuals ( $R1$ ,  $wR2$ ).

All the structures were solved with direct methods and refined using full-matrix least squares on  $F^2$  with SHELXL-2013 (Sheldrick, 2008). Anisotropic displacement parameters were assigned to non-H atoms. In **1a**, **2a** and **3a**, all the hydrogen atoms were located from difference Fourier maps and their positions were freely refined. In **2b**, **2c**, **3b** and **3c**, the hydrogen atoms bonded with N (and O in **3b**) were located from difference Fourier maps, and their positions were refined with distance restraints. All the other H atoms were treated with riding model. Crystal data, data collection and refinement results have been compiled in Table S1.

### **Powder Diffraction**

Flat samples were prepared for all the compounds by fixing the sample powder on a Mylar X-ray Film (6.0  $\mu\text{m}$  thick) using Vaseline oil. X-ray powder diffractions were performed by Cu  $K\alpha_1$  radiation (1.54056  $\text{\AA}$ ) monochromated by germanium with a linear Position Sensitive Detector (PSD).

### **Raman Spectroscopy**

Raman spectroscopy measurements were done at room temperature with single crystals using Bruker SENTERRA Dispersive Raman Microscope. In a typical experiment, a green laser (532 nm) was focused on the single crystal placed on a glass slide with a 50x objective lens.

Table S1. Details of the crystal data, data collection and refinement results.

| Crystal data                                                                                                   | 1a                                                                 | 2a                                                                 | 2b                                                                                                                    | 2c                                                                                                     |
|----------------------------------------------------------------------------------------------------------------|--------------------------------------------------------------------|--------------------------------------------------------------------|-----------------------------------------------------------------------------------------------------------------------|--------------------------------------------------------------------------------------------------------|
| <b>Chemical formula</b>                                                                                        | C <sub>10</sub> H <sub>11</sub> ClIN <sub>4</sub> O <sub>2</sub> S | C <sub>10</sub> H <sub>11</sub> BrIN <sub>4</sub> O <sub>2</sub> S | C <sub>10</sub> H <sub>11</sub> N <sub>4</sub> O <sub>2</sub> S·Br·0.5(C <sub>2</sub> H <sub>6</sub> O <sub>2</sub> ) | 2(C <sub>10</sub> H <sub>11</sub> N <sub>4</sub> O <sub>2</sub> S)·2Br·C <sub>2</sub> H <sub>6</sub> O |
| <i>M<sub>r</sub></i>                                                                                           | 413.64                                                             | 458.10                                                             | 362.23                                                                                                                | 708.46                                                                                                 |
| <b>Crystal system, space group</b>                                                                             | Triclinic, <i>P</i> $\bar{1}$                                      | Triclinic, <i>P</i> $\bar{1}$                                      | Triclinic, <i>P</i> $\bar{1}$                                                                                         | Triclinic, <i>P</i> $\bar{1}$                                                                          |
| <i>a</i> , <i>b</i> , <i>c</i> (Å)                                                                             | 5.6561(6),<br>11.4126(12),<br>12.2064(12)                          | 5.7185(3),<br>11.6440(6),<br>12.3493(6)                            | 5.7078(5),<br>11.5383(10),<br>12.198(1)                                                                               | 5.709(3),<br>11.532(6),<br>12.116(6)                                                                   |
| $\alpha$ , $\beta$ , $\gamma$ (°)                                                                              | 116.6140(10),<br>91.131(2),<br>104.114(2)                          | 116.6971(6),<br>91.7117(6),<br>104.1699(8)                         | 62.8640(10),<br>79.4180(10),<br>76.9800(12)                                                                           | 62.675(8),<br>79.693(9),<br>77.507(9)                                                                  |
| <i>V</i> (Å <sup>3</sup> )                                                                                     | 675.58 (12)                                                        | 702.93(6)                                                          | 693.50(10)                                                                                                            | 689.0(6)                                                                                               |
| <i>Z</i>                                                                                                       | 2                                                                  | 2                                                                  | 2                                                                                                                     | 1                                                                                                      |
| $\mu$ (mm <sup>-1</sup> )                                                                                      | 2.73                                                               | 5.27                                                               | 3.13                                                                                                                  | 3.14                                                                                                   |
| <b>Crystal size (mm)</b>                                                                                       | 0.28×0.04×0.02                                                     | 0.20×0.08×0.03                                                     | 0.32×0.16×0.14                                                                                                        | 0.19×0.08×0.02                                                                                         |
| <b>Data collection</b>                                                                                         |                                                                    |                                                                    |                                                                                                                       |                                                                                                        |
| <b>No. of measured, independent and observed [<i>I</i> &gt; 2σ(<i>I</i>)] reflections</b>                      | 52171,<br>15116,<br>11174                                          | 32221,<br>15396,<br>11601                                          | 10816,<br>4018,<br>3652                                                                                               | 8218,<br>2849,<br>2084                                                                                 |
| <i>R</i> <sub>int</sub>                                                                                        | 0.078                                                              | 0.042                                                              | 0.035                                                                                                                 | 0.092                                                                                                  |
| <b>Refinement (based on all <i>F</i><sup>2</sup>)</b>                                                          |                                                                    |                                                                    |                                                                                                                       |                                                                                                        |
| <i>R</i> [ <i>F</i> <sup>2</sup> > 2σ( <i>F</i> <sup>2</sup> )], <i>wR</i> ( <i>F</i> <sup>2</sup> ), <i>S</i> | 0.048, 0.120, 1.04                                                 | 0.039, 0.097, 0.98                                                 | 0.036, 0.082, 1.05                                                                                                    | 0.055, 0.118, 1.00                                                                                     |
| <b>No. of reflections</b>                                                                                      | 15116                                                              | 15396                                                              | 4018                                                                                                                  | 2849                                                                                                   |
| <b>No. of parameters</b>                                                                                       | 205                                                                | 205                                                                | 197                                                                                                                   | 190                                                                                                    |
| <b>No. of restraints</b>                                                                                       | 0                                                                  | 0                                                                  | 0                                                                                                                     | 13                                                                                                     |
| $\Delta\rho_{\max}$ , $\Delta\rho_{\min}$ (e Å <sup>-3</sup> )                                                 | 2.85, -2.27                                                        | 3.15, -1.93                                                        | 1.75, -1.00                                                                                                           | 0.70, -0.76                                                                                            |

| Crystal data                       | 3a                                                                             | 3b                                                                                                                               | 3c                                                                             |
|------------------------------------|--------------------------------------------------------------------------------|----------------------------------------------------------------------------------------------------------------------------------|--------------------------------------------------------------------------------|
| <b>Chemical formula</b>            | C <sub>10</sub> H <sub>11</sub> I <sub>2</sub> N <sub>4</sub> O <sub>2</sub> S | C <sub>10</sub> H <sub>11</sub> N <sub>4</sub> O <sub>2</sub> S,<br>C <sub>2</sub> H <sub>6</sub> O <sub>2</sub> ,I <sub>3</sub> | C <sub>10</sub> H <sub>11</sub> N <sub>4</sub> O <sub>2</sub> S·I <sub>5</sub> |
| <i>M<sub>r</sub></i>               | 505.65                                                                         | 694.07                                                                                                                           | 885.79                                                                         |
| <b>Crystal system, space group</b> | Triclinic, <i>P</i> $\bar{1}$                                                  | Triclinic, <i>P</i> $\bar{1}$                                                                                                    | Triclinic, <i>P</i> $\bar{1}$                                                  |
| <i>a</i> , <i>b</i> , <i>c</i> (Å) | 5.7879(14),<br>11.983(3),<br>12.568(3)                                         | 8.0577(9),<br>10.8694(12),<br>11.7471(13)                                                                                        | 8.004(2),<br>11.247(3),<br>11.473(3)                                           |
| $\alpha$ , $\beta$ , $\gamma$ (°)  | 61.725(3),<br>87.456(2),<br>76.227(2)                                          | 84.291(2),<br>74.230(2),<br>85.792(2)                                                                                            | 83.925(4),<br>89.442(4),<br>72.371(4)                                          |
| <i>V</i> (Å <sup>3</sup> )         | 743.2(3)                                                                       | 984.05(19)                                                                                                                       | 978.6(5)                                                                       |
| <i>Z</i>                           | 2                                                                              | 2                                                                                                                                | 2                                                                              |
| $\mu$ (mm <sup>-1</sup> )          | 4.38                                                                           | 4.89                                                                                                                             | 8.06                                                                           |
| <b>Crystal size (mm)</b>           | 0.08×0.07×0.03                                                                 | 0.25×0.12×0.02                                                                                                                   | 0.31×0.12×0.04                                                                 |
| <b>Data collection</b>             |                                                                                |                                                                                                                                  |                                                                                |

|                                                                                                                     |                           |                         |                         |
|---------------------------------------------------------------------------------------------------------------------|---------------------------|-------------------------|-------------------------|
| <b>No. of measured,<br/>independent and observed<br/>[<math>I &gt; 2\sigma(I)</math>] reflections</b>               | 58775,<br>16488,<br>12136 | 14607,<br>5581,<br>4921 | 13904,<br>5420,<br>4289 |
| <b><math>R_{\text{int}}</math></b>                                                                                  | 0.057                     | 0.049                   | 0.059                   |
| <b>Refinement (based on all <math>F^2</math>)</b>                                                                   |                           |                         |                         |
| <b><math>R[F^2 &gt; 2\sigma(F^2)]</math>, <math>wR(F^2)</math>, <math>S</math></b>                                  | 0.043, 0.097, 1.03        | 0.031, 0.079, 1.04      | 0.048, 0.125, 1.07      |
| <b>No. of reflections</b>                                                                                           | 16488                     | 5581                    | 5420                    |
| <b>No. of parameters</b>                                                                                            | 216                       | 239                     | 215                     |
| <b>No. of restraints</b>                                                                                            | 0                         | 2                       | 4                       |
| <b><math>\Delta\rho_{\text{max}}</math>, <math>\Delta\rho_{\text{min}}</math> (<math>e \text{ \AA}^{-3}</math>)</b> | 2.65, -1.03               | 1.47, -0.97             | 2.92, -1.41             |
| <b>Crystal size (mm)</b>                                                                                            | 0.08×0.07×0.03            | 0.25×0.12×0.02          | 0.31×0.12×0.04          |

Table S2. Secondary interactions in the parent compound **1b** and in the tetrahalide derivatives **1a**, **2a** and **3a**.

| <b>D<math>\cdots</math>A (<math>\text{\AA}</math>)</b>             | <b>Parent compound<br/>1b</b> | <b>1a</b>  | <b>2a</b>  | <b>3a</b>  |
|--------------------------------------------------------------------|-------------------------------|------------|------------|------------|
| <b>Contacts</b>                                                    |                               |            |            |            |
| <b>N1-H1<math>\cdots</math>N3<sup>a</sup></b>                      | 2.9037(9)                     | 2.8908(17) | 2.9010(15) | 2.908(2)   |
| <b>N4-H4A<math>\cdots</math>O1<sup>b</sup></b>                     | 3.1452(7)                     | 2.8589(18) | 2.8274(16) | 2.796(2)   |
| <b>N4-H4B<math>\cdots</math>X<sup>c</sup></b>                      | 3.2125(9)                     | 3.2495(14) | 3.3618(12) | 3.5302(16) |
| <b>N4-H4C<math>\cdots</math>X<sup>d</sup></b>                      | 3.1443(7)                     | 3.1635(14) | 3.2910(12) | 3.4742(16) |
| <b>N4<math>\cdots</math>X<sup>e</sup></b>                          | 3.2184(7)                     | 3.2543(16) | 3.3511(14) | 3.517(2)   |
| <b>O3-H3O<math>\cdots</math>X<sup>f</sup></b>                      | 3.2215(9)                     | —          | —          | —          |
| <b><math>\pi_{\text{pm}}\cdots\pi_{\text{pm}}</math></b>           | 3.693 (2)                     | 3.664 (2)  | 3.675 (2)  | 3.693 (2)  |
| <b><math>\pi_{\text{aniline}}\cdots\pi_{\text{aniline}}</math></b> | 3.858 (2)                     | 3.763 (2)  | 3.786 (2)  | 3.832 (2)  |
| <b>I-I<sup>g</sup></b>                                             | —                             | 2.7192(6)  | 2.7368(2)  | 2.7660(8)  |
| <b>H<math>\cdots</math>X<sup>h</sup></b>                           | —                             | 3.2416(6)  | 3.2836(2)  | 3.3686(9)  |
| <b>R<sub>XB</sub></b>                                              | —                             | 0.87       | 0.86       | 0.85       |

Note: for **parent compound**, *a*, 1-*x*, 1-*y*, -*z*; *b*, 1-*x*, 1-*y*, -*z*; *c*, *x*, *y*, *z*; *d*, *x*-1, *y*, *z*; *e*, 1-*x*, 2-*y*, -*z*; for the **1a** and **2a**, *a*, 1-*x*, 2-*y*, -*z*; *b*, 1-*x*, 2-*y*, 1-*z*; *c*, *x*-1, *y*, *z*; *d*, *x*, *y*, *z*; *e*, 1-*x*, 1-*y*, 1-*z*; *f*, 1-*x*, 1-*y*, *z*; for **3a**, *a*, 1-*x*, 2-*y*, 1-*z*; *b*, 1-*x*, 2-*y*, -*z*; *c*, *x*-1, *y*, *z*; *d*, *x*, *y*, *z*; *e*, 2-*x*, 1-*y*, -*z*; *f*, 2-*x*, 1-*y*, 1-*z*.

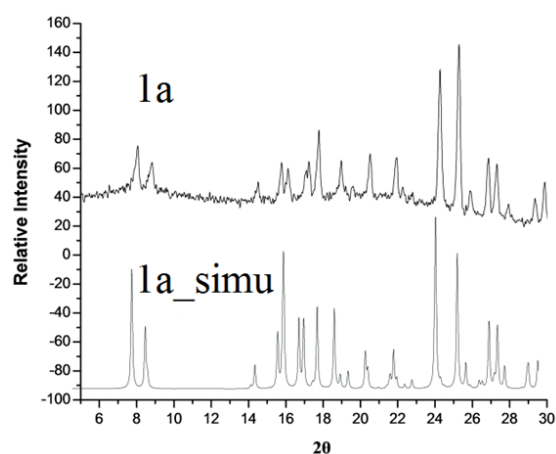

Figure S1. Comparison of the experimental powder diffraction with the simulated one from X-ray structure for **1a**.

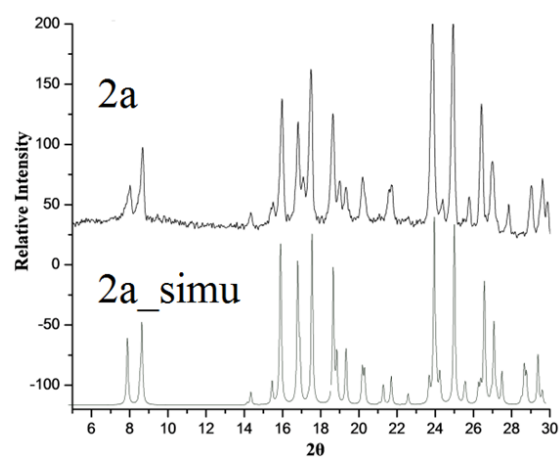

Figure S2. Comparison of the experimental powder diffraction with the simulated one from X-ray structure for **2a**.

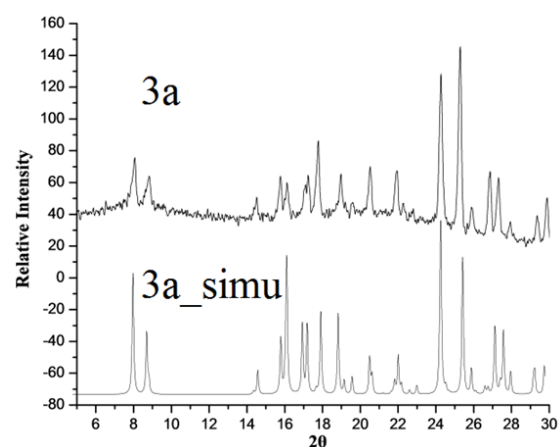

Figure S3. Comparison of the experimental powder diffraction with the simulated one from X-ray structure for **3a**.

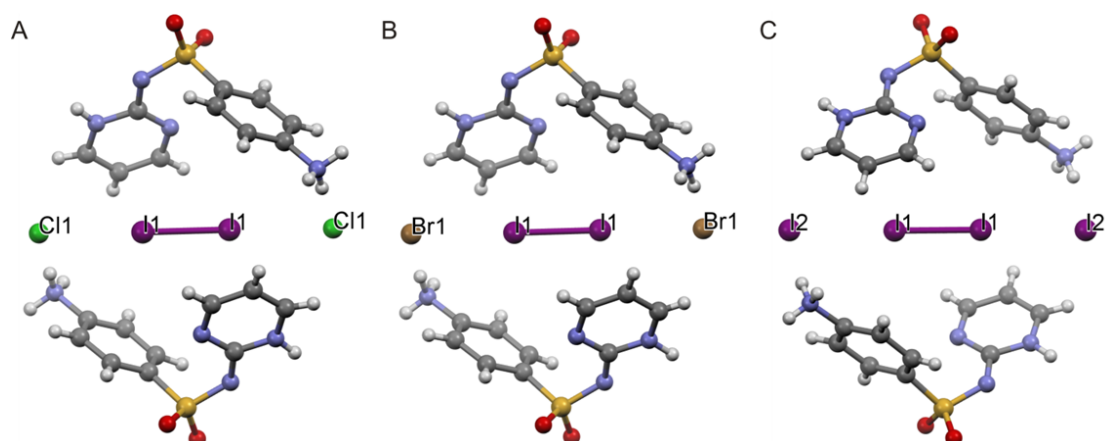

Figure S4. Plots of the macrocyclic structures of **1a** (A), **2a** (B) and **3a** (C) to show the isomorphism.

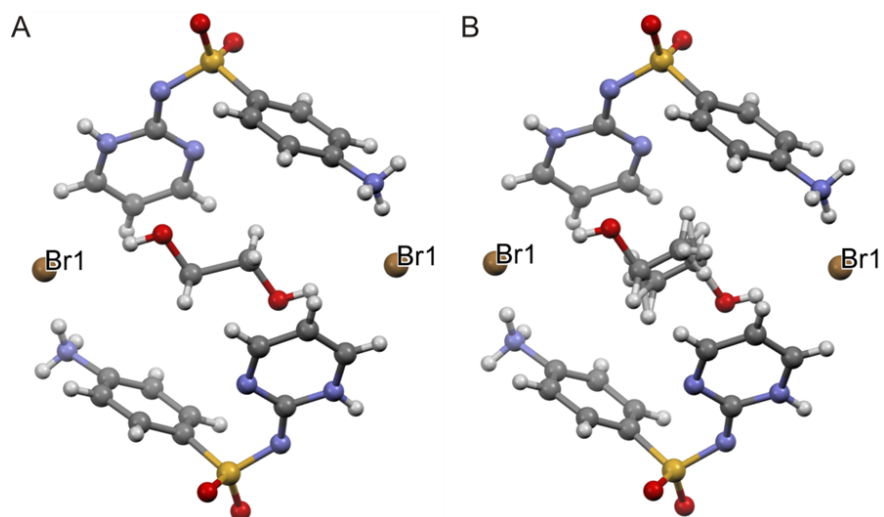

Figure S5. Plots of the macrocyclic structures **2b** (A) and **2c** (B).

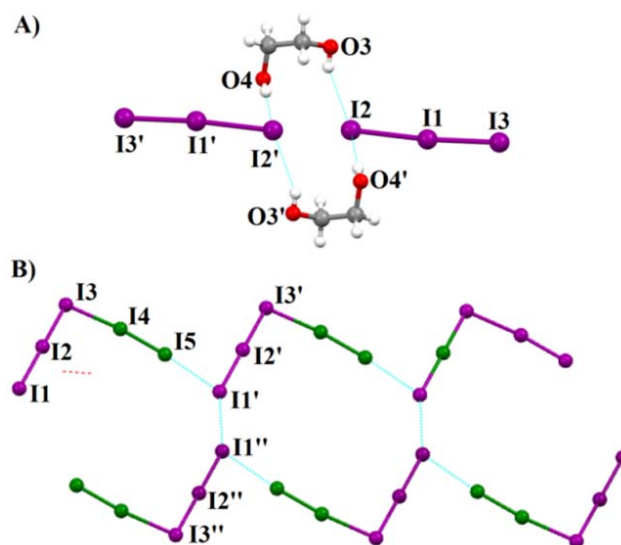

Figure S6. Hydrogen bonds between glycol and triiodide in **3b** (A) and halogen bonds between neighbouring pentaiodides in **3c** (B). The bonding distances in **3b**: O3...I2 = 3.543, O4...I2' = 3.551; the bonding distances and angles in **3c**: I1-I2 = 2.842, I2-I3 = 3.025, I3-I4 = 3.219, I4-I5 = 2.776, I5...I1' = 3.576, I1'...I1'' = 3.676, I1-I2-I3 = 173.25, I2-I3-I4 = 96.17, I3-I4-I5 = 173.99; I4-I5...I1' = 175.38, I5...I1'...I2' = 85.55, I2'...I1'...I1'' = 151.58 Å. Symmetry operators: 1-x, 1-y, -x in A and x, 1+y, z for I', -x, 2-y, 1-z for I'' in B.

### Raman spectroscopy in 1a, 2a and 3a

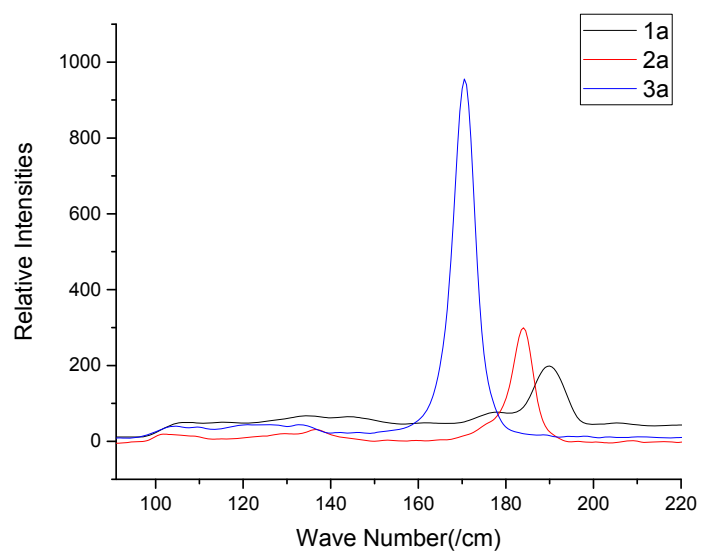

Figure S7. Shift of the Raman band associated with the central I-I bond in the tetrahalide derivatives **1a**, **2a** and **3a**.
